# Supplementary material for: Improved electrochemical properties of polypyrrole with cucurbit[6]uril via supramolecular interactions
Source: Royal Society of Chemistry journal article supplement (doi:10.1039/d2cp00321j), 2022-01-01
Supplement: d2cp00321j1.pdf [file d2cp00321j1.pdf]

## Supporting Information

### Improved electrochemical properties of polypyrrole with cucurbit[6]uril via supramolecular interactions

Xian-Yi Jin<sup>1,2</sup>, Xin Dai<sup>1</sup>, Jie Zhao<sup>1</sup>, Qingmei Ge<sup>1</sup>, Mao Liu<sup>1</sup>, Zhu Tao<sup>2</sup>, Hang Cong<sup>1,\*</sup>

<sup>1</sup>Enterprise Technology Center of Guizhou Province, Guizhou University, Guiyang, 550025, China. Email: [hcong@gzu.edu.cn](mailto:hcong@gzu.edu.cn).

<sup>2</sup>Key Laboratory of Macrocyclic and Supramolecular Chemistry of Guizhou Province, Guizhou University, Guiyang, 550025, China.

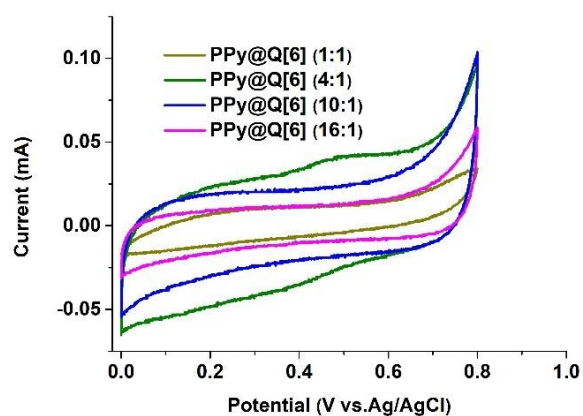

Figure S1 CVs of the composite electrodes at a scan rate of 10 mV s<sup>-1</sup>.

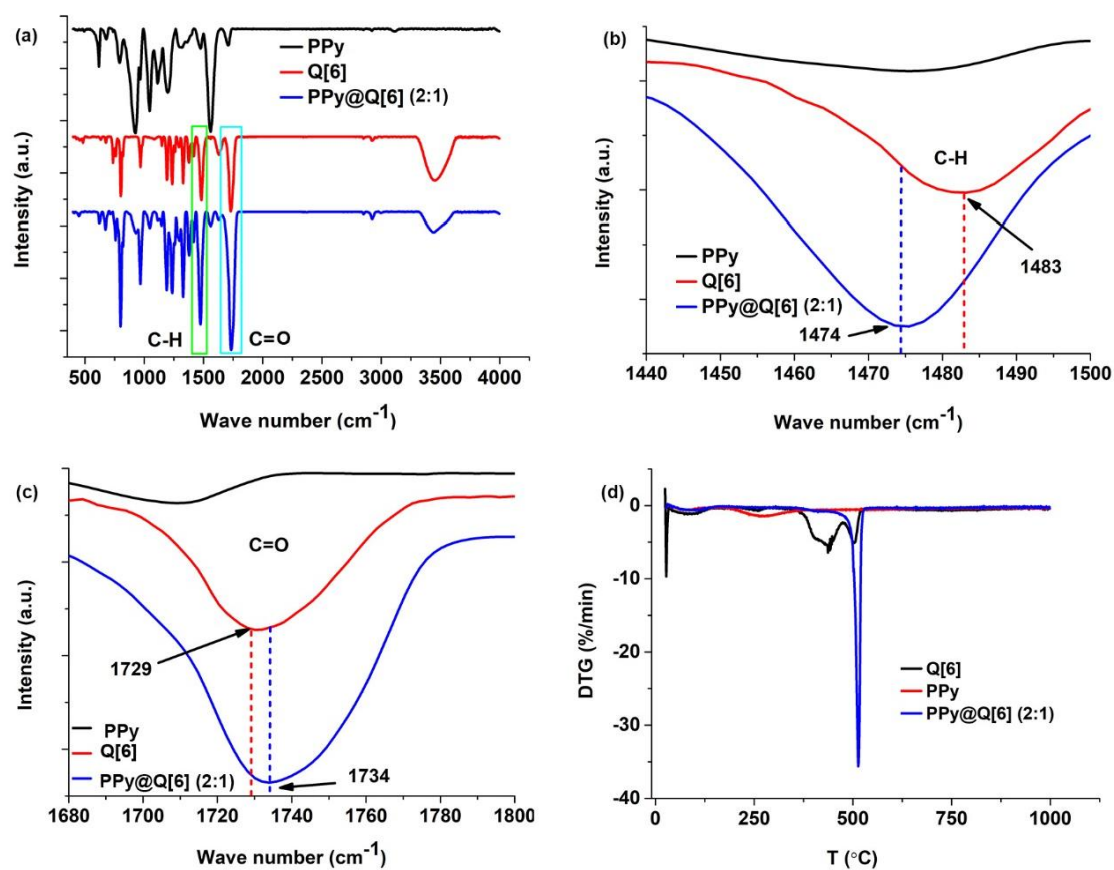

Figure S2 a) FTIR of the composites; b) Magnified FTIR of the composites; c) Magnified FTIR of the composites; d) DTG curves of the composites.

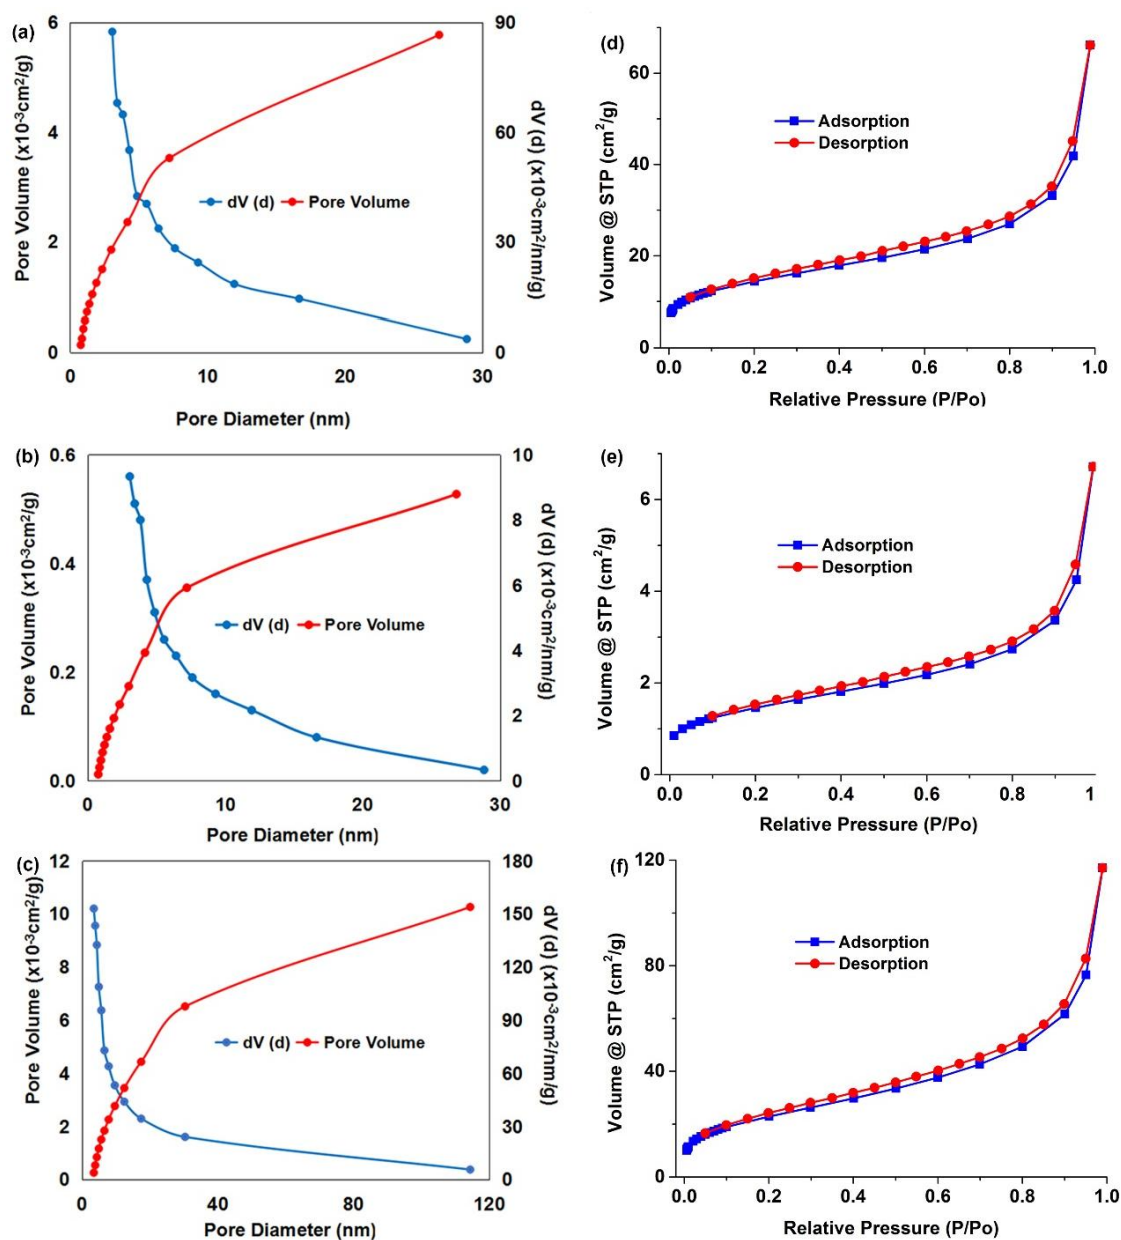

Figure S3 BET of a) PPy; b) Q[6]; c) PPy@Q[6] composites; BJT of d) PPy, e) Q[6], f)

PPy@Q[6] (2:1) composites.

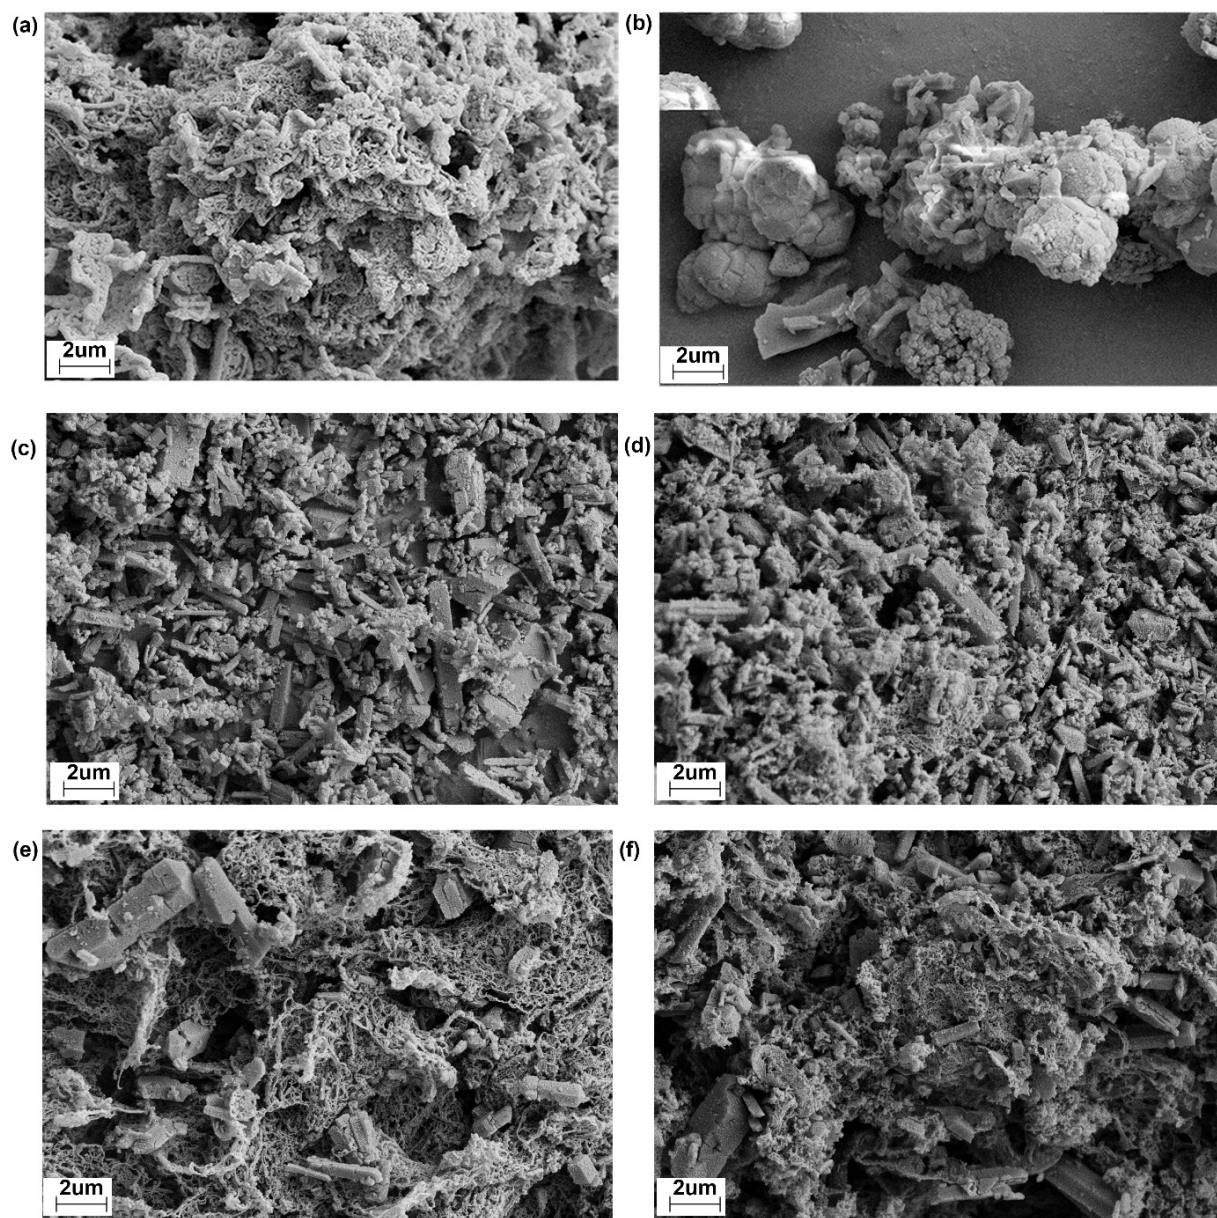

Figure S4 SEM images of a) PPy; b) Q[6]; c) PPy@Q[6] (1:1), d) PPy@Q[6] (4:1), e) PPy@Q[6] (10:1), f) PPy@Q[6] (16:1).

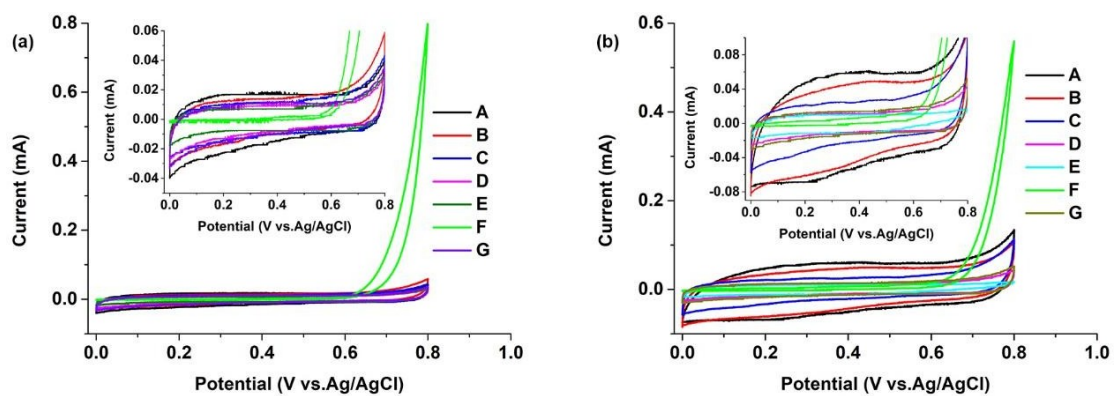

Figure S5 CVs of the PPy (a), PPy@Q[6] (2:1) (b) at a scan rate of  $10 \text{ mV s}^{-1}$  in different electrolytes, (A. 0.1 KCl and 5.0 M  $\text{H}_2\text{SO}_4$ ; B. 0.1 KCl and 1.0 M  $\text{H}_2\text{SO}_4$ ; C. 0.1 KCl and 0.1 M  $\text{H}_2\text{SO}_4$ ; D. 0.1 KCl and 0.01M  $\text{H}_2\text{SO}_4$ ; E. 0.1 KCl ; F. 0.1 KCl and 1.0 M NaOH; G. 1.0 M  $\text{H}_2\text{SO}_4$ ).

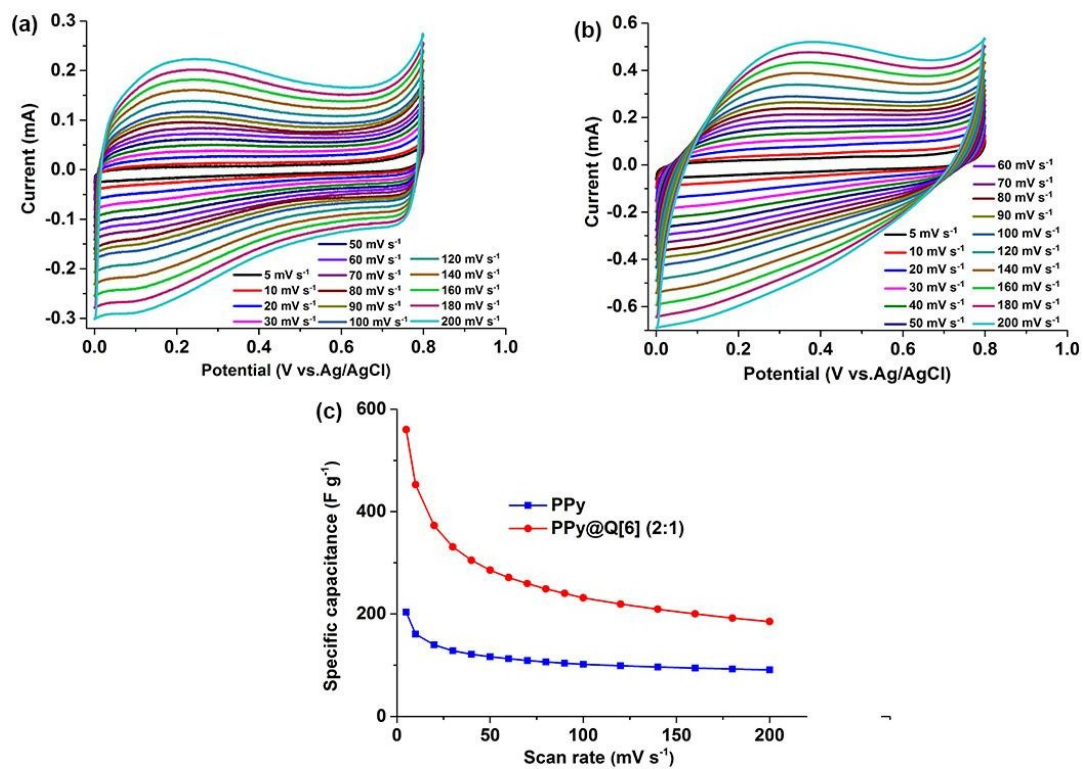

Figure S6 (a) CV curves of PPy at different scan rates; (b) CV curves of PPy@Q[6] (2:1) at different scan rates; (c) specific capacitance values of the two electrodes at different scan rates.

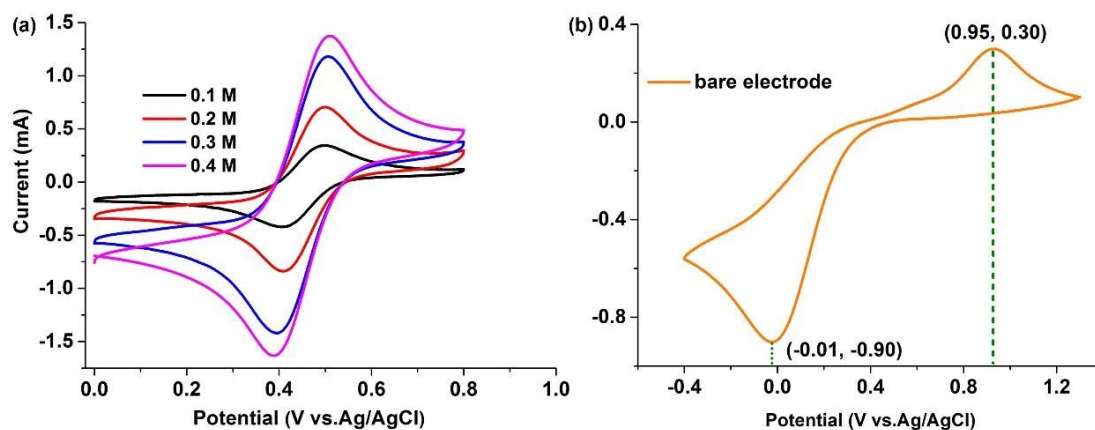

Figure S7 a) CVs of PPy@Q[6] (2:1) composite electrode in electrolytes of 1.0 M  $\text{H}_2\text{SO}_4$  and 0.1-0.4 M  $\text{Fe}_2(\text{SO}_4)_3$  at a scan rate of  $10 \text{ mV s}^{-1}$ ; b) CV of bare electrode in electrolytes of 1.0 M  $\text{H}_2\text{SO}_4$  and 0.4 M  $\text{Fe}_2(\text{SO}_4)_3$  at a scan rate of  $10 \text{ mV s}^{-1}$ .

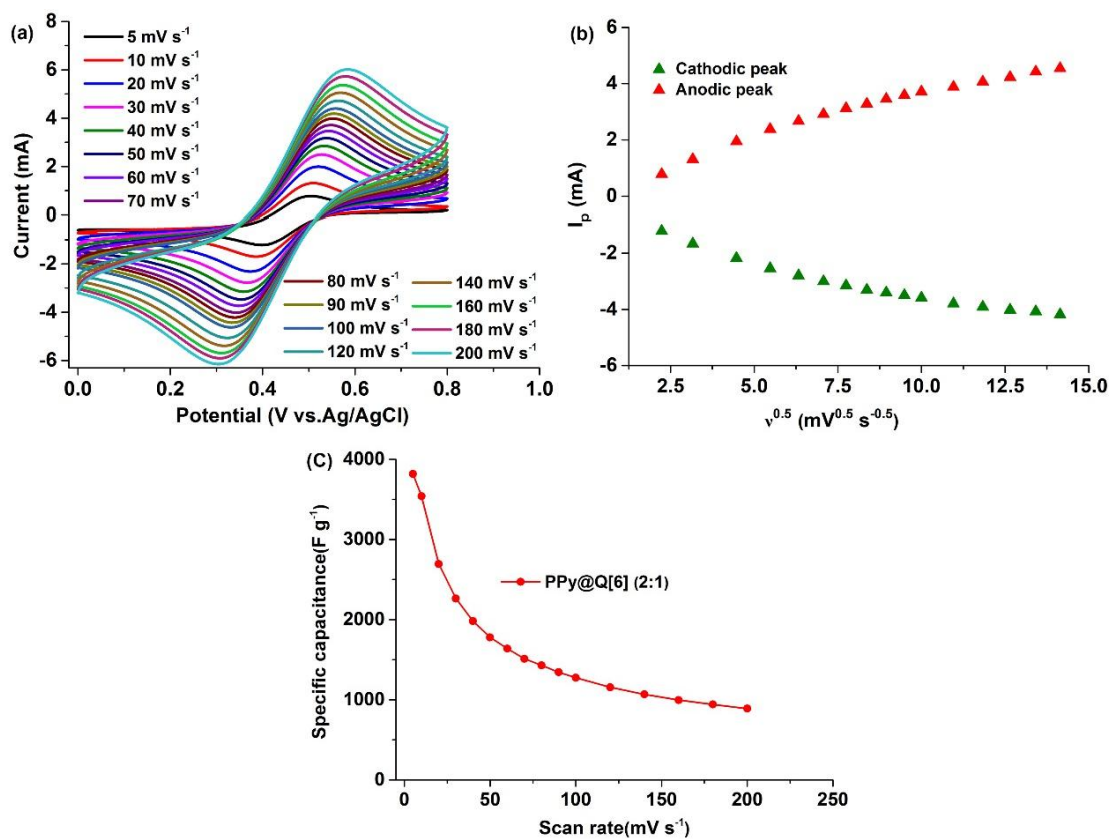

Figure S8 a) CV curves of PPy@Q[6] (2:1) electrode at different scan rates in the mixed electrolytes of 1.0 M  $\text{H}_2\text{SO}_4$  and 0.4 M  $\text{Fe}_2(\text{SO}_4)_3$ ; b) dependence of peak current  $I_p$  on the square root of scan rate  $v^{0.5}$  for composite electrodes; c) specific capacitance values of PPy@Q[6] (2:1) electrode at different scan rates in the mixed electrolytes of 1.0 M  $\text{H}_2\text{SO}_4$  and 0.4 M  $\text{Fe}_2(\text{SO}_4)_3$ .

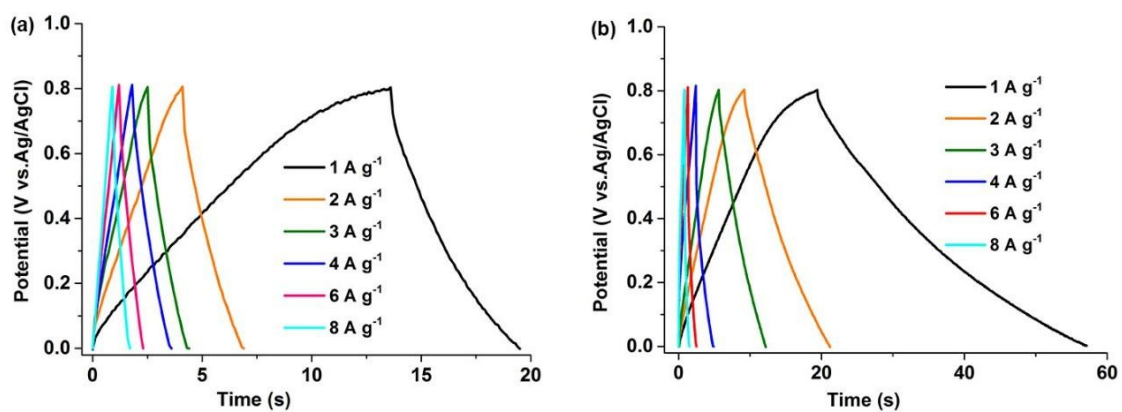

Figure S9 (a) GCD curves of PPy at several current densities; (b) GCD curves of PPy@Q[6] (2:1) at different current densities.

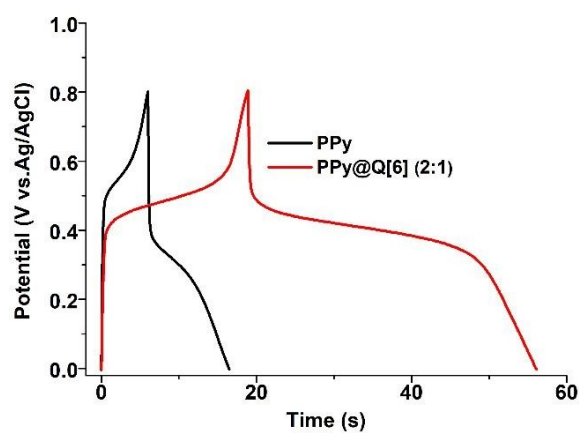

Figure S10 GCD curves at 10 A g<sup>-1</sup> current density.

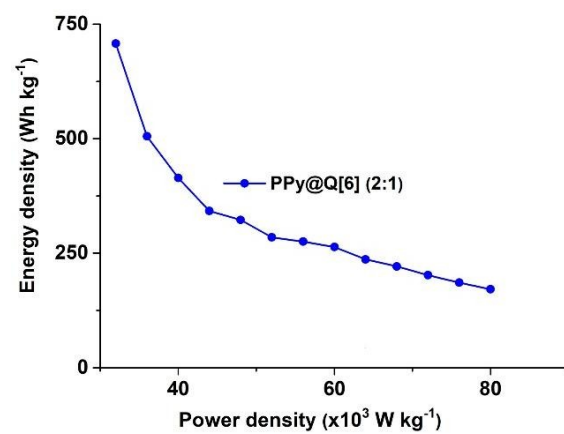

Figure S11 Ragone plots at current densities of 8–20  $\text{A g}^{-1}$ .

The derivation of eq (3) and (4) in Experimental section 2.4:

$$E = 1/2 \times C_{sp} V^2 \quad (S1)$$

where  $E$  (J) represents the energy density,  $C_{sp}$  (F g<sup>-1</sup>) represents the estimated specific capacitance of the ASC device,  $V$  (V) is the working potential window.

1 W h = 3600 J, 1 kg = 1000 g, eq (S1) could be given as:

$$E = 1/2 \times C_{sp} \times V^2 \times (1/3600) \times 1000 \quad (S2)$$

$$E = 1/(2 \times 3.6) C_{sp} V^2 \quad (S3)$$

where  $E$  (W h kg<sup>-1</sup>) represents the energy density,  $C_{sp}$  (F g<sup>-1</sup>) represents the estimated specific capacitance of the ASC device,  $V$  (V) is the working potential window.

$$P = E/\Delta t \quad (S4)$$

where  $E$  (W s kg<sup>-1</sup>) represents the energy density,  $P$  (W kg<sup>-1</sup>) represents the power density,  $\Delta t$  (s) is the discharging time as obtained from the GCD profiles.

1 h = 3600 s, therefore, eq (S4) could be described to be

$$P = 3600 E/\Delta t \quad (S5)$$

where  $E$  (W h kg<sup>-1</sup>) represents the energy density,  $P$  (W kg<sup>-1</sup>) represents the power density,  $\Delta t$  (s) is the discharging time as obtained from the GCD profiles.
